# Supplementary material for: Increasing the H+ exchange capacity of porous titanium phosphonate materials by protecting defective P–OH groups
Source: Royal Society of Chemistry journal article supplement (doi:10.1039/c1cc11583a), 2011-01-01
Supplement: c1cc11583a.pdf [file c1cc11583a.pdf]

## Supplementary Information:

### **Increasing the H<sup>+</sup> exchange capacity of porous titanium phosphonate materials by protecting defective P–OH groups**

*Tian-Yi Ma, Lei Liu, Qing-Fang Deng, Xiu-Zhen Lin and Zhong-Yong Yuan\**

Institute of New Catalytic Materials Science, Key Laboratory of Advanced Energy Materials Chemistry (Ministry of Education), College of Chemistry, Nankai University, Tianjin 300071, China. *E-mail:* [zyyuan@nankai.edu.cn](mailto:zyyuan@nankai.edu.cn)

### **Experimental Section**

**Materials.** Tetrabutyl titanate was obtained from Tianjin Kermel Chemical Co. Diethylenetriamine penta(methylene phosphonic acid) (DTPMPA) was received from Henan Qingyuan Chemical Co. Acetone, methanol, n-propylamine, n-butylamine and n-pentylamine were provided by Tianjin Hongfengke industrial & trading Co., Ltd. Commercial acidic resin NKC-9 was obtained from Nankai University Chemical Plant. D-ribose was provided by Xinxiang Tuoxin Biochemical Science & Technology Co., Ltd. All chemicals were used as received without further purification.

**Synthesis of hierarchically macro-/mesoporous titanium phosphonate materials.** In a typical synthesis procedure, 0.005 mol of DTPMPA was added into a mixed solution of 30 ml water and 10 ml ethanol in the presence of n-propylamine, n-butylamine and n-pentylamine with different concentrations (alkyl amine/DTPMPA molar ratio of 0, 0.05, 0.10, 0.15, 0.20, 0.25, 0.30 and 0.35) to form a homogenous solution, followed by stirring for 30 min. Tetrabutyl titanate (P/Ti molar ratio ranging from 0.6 to 4.0) was dropwise added into the obtained solution very slow, followed by stirring for another 24 h

at room temperature. The resultant mixture was filtered, dried, and extracted by hydrochloric acid (pH =1) for three times at 70 °C to remove the alkyl amines, and then washed with water repeatedly. Titanium phosphonate materials synthesized with added P/Ti ratio of 2.5 and n-butylamine/DTPMPA ratio of 0.3 were chosen for detailed discussions, marked as TiPPh-butylamine. Titanium phosphonate materials synthesized without amines and titanium phosphate materials synthesized with n-butylamine were marked as TiPPh-non and TiP-butylamine, respectively, for comparison.

**Characterization.** Scanning electron microscopy (SEM) and transmission electron microscopy (TEM) were carried out on a Shimadzu SS-550 microscope at 15 keV and a Philips Tecnai G20 at 200 kV, respectively. Fourier transform infrared (FT-IR) spectra were measured on a Bruker VECTOR 22 spectrometer with KBr pellet technique, and the ranges of spectrograms were 4000 to 400  $\text{cm}^{-1}$ . X-ray diffraction (XRD) patterns were recorded on a Rigaku D/max-2500 diffractometer with  $\text{CuK}\alpha$  radiation operated at 40 kV and 100 mA. The chemical compositions of Ti and P were analyzed by inductively coupled plasma (ICP) emission spectroscopy on a Thermo Jarrell-Ash ICP-9000 (N+M) spectrometer. Solid-state  $^{31}\text{P}$  magic angle spinning (MAS) nuclear magnetic resonance (NMR) measurement was performed on a Varian Unity plus-400 spectrometer at spinning rate of 12 kHz and resonance frequency of 161.9 MHz with recycle time of 5 s.  $\text{N}_2$  adsorption-desorption isotherms were recorded on a Quantachrome NOVA 2000e sorption analyzer at liquid nitrogen temperature (77 K). The samples were degassed at 150 °C overnight prior to the measurement. The surface areas were calculated by the multi-point Brunauer-Emmett-Teller (BET) method, and the pore size distribution was calculated from the adsorption branch of the isotherms by the Barret-Joyner-Halenda (BJH) model.

**Determination of  $\text{H}^+$  exchange capacity.** The ion exchange capacity was determined from the titration curve according to the literatures [S. Inagaki, et al. *Nature*, 2002, 416, 304; T. Y. Ma, et al. *Chem. Commun.*, 2010, 46, 2325.]. The obtained titanium phosphonate material (50 mg) was immersed in 10 wt.% sodium chloride aqueous solution for 24 hours to fully exchange the  $\text{H}^+$  ions. The solution was

titrated with NaOH solution (0.05 mol/L) to produce the titration curve. Differential titration curve was drawn to determine the ion exchange capacity of titanium phosphonates at the inflexion.

**Catalytic activity test.** The synthesized titanium phosphonate materials were used as the acid catalyst in the synthesis of methyl-2,3-*O*-isopropylidene- $\beta$ -D-ribofuranoside from D-ribose. 1.5 g of D-ribose was first dissolved into the mixed solution of acetone (6 ml) and methanol (6 ml), and then 0.5 g of the obtained catalyst was added. After the reaction was refluxed at 70 °C for 3 h, the mixture was cooled and filtrated to separate the solid catalysts and the residues. For concentrated HCl (conc. HCl, 37.5 wt.%) catalytic reaction, the filtrate was neutralized (pH 6–7) with NaHCO<sub>3</sub> solution. The resulting solution was once again filtered through a Celite bed and evaporated to remove acetone and methanol. The organic layer thus obtained was extracted with ethyl ether (3×10 ml), washed with brine, dried by anhydrous Na<sub>2</sub>SO<sub>4</sub> and evaporated in vacuo to yield methyl-2,3-*O*-isopropylidene- $\beta$ -D-ribofuranoside according to the reference [P. Sairam, et al. *Carbohydr. Res.*, 2003, 338, 303.]. The products were characterized by <sup>1</sup>H NMR (400M, CDCl<sub>3</sub>): 4.91 (s, 1 H), 4.78 (d, 1 H, *J* = 6 Hz), 4.53 (d, 1 H, *J* = 6 Hz), 4.37 (m, 1 H), 3.61 (m, 2 H), 3.56 (s, 3 H), 3.37 (m, 1 H), 1.42 (s, 3 H), 1.25 (s, 3 H); <sup>13</sup>C NMR (300 MHz, CDCl<sub>3</sub>): 112.0, 109.6, 87.9, 85.5, 81.4, 63.6, 55.1, 26.2, 24.6, which was in agreement with those reported in the literature [P. Sairam, et al. *Carbohydr. Res.*, 2003, 338, 303; A. K. Gosh, et al. *J. Org. Chem.*, 1996, 61, 6175.]. Performances of various catalysts were evaluated in terms of the percentage of product yields, which is defined as follows: Product yield (%) = [Actual moles of product formed] / [Expected moles of product formed based on D-ribose consumed] × 100%. The formation reaction of methyl-2,3-*O*-isopropylidene- $\beta$ -D-ribofuranoside from D-ribose was expressed in Scheme S1.

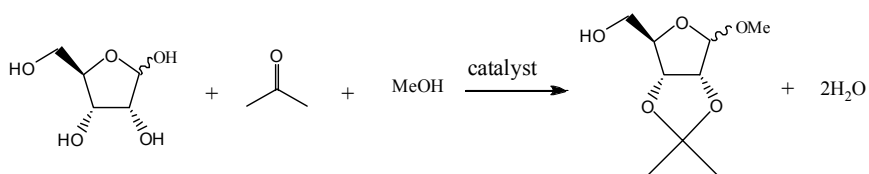

**Scheme S1**

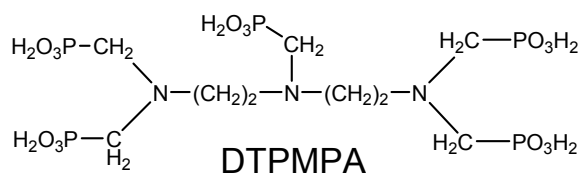

**Scheme S2** Structure of the phosphonic acid DTPMPA.

**Table S1** Hammett acidities of the synthesized catalysts.

| Hammett indicators                                         | TiPPh-butylamine | TiPPh-non | TiP-butylamine | PMTP-1 | NKC-9 |
|------------------------------------------------------------|------------------|-----------|----------------|--------|-------|
| Anthraquinone<br>(pK <sub>a</sub> = -8.20)                 | +                | -         | +              | -      | +     |
| <i>p</i> -nitrotoluene<br>(pK <sub>a</sub> = -11.35)       | -                | -         | -              | -      | +     |
| <i>p</i> -nitrochlorobenzene<br>(pK <sub>a</sub> = -12.70) | -                | -         | -              | -      | -     |
| 2,4-dinitrotoluene<br>(pK <sub>a</sub> = -13.75)           | -                | -         | -              | -      | -     |

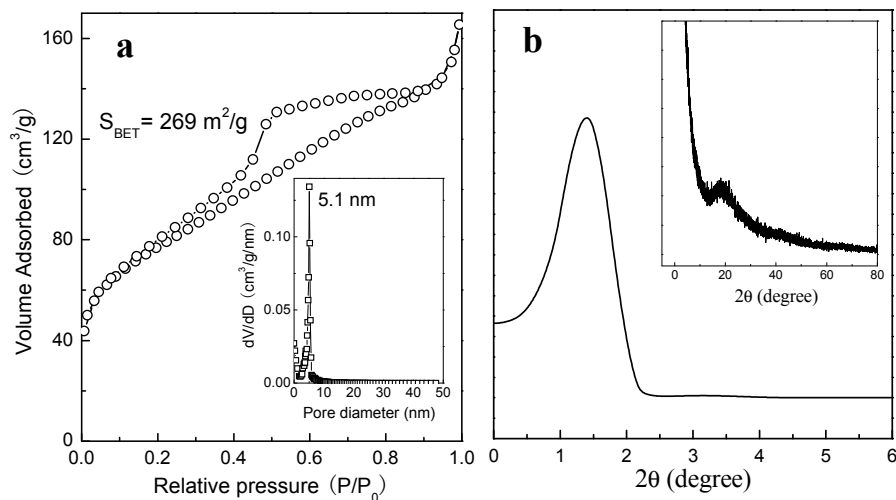

**Fig. S1** (a) N<sub>2</sub> sorption isotherms and (*inset*) the corresponding pore size distribution curve calculated by BJH method, and (b) small and wide (*inset*) angle XRD patterns of TiPPh-amine and TiPPh-non.

The N<sub>2</sub> sorption isotherm of TiPPh-butylamine is of type IV with a hysteresis loop of type H2 (Fig. S1a), characteristic of mesoporous materials according to the IUPAC classification. An increase in the volume of nitrogen adsorbed at high relative pressure ( $P/P_0 > 0.9$ ) can be observed on the isotherm, indicating an appreciable amount of macroporosity [M. Kruk, M. Jaroniec, *Chem. Mater.* **2001**, *13*, 3169.], as observed in the SEM images. The surface area is 269 m<sup>2</sup>/g with pore volume of 0.22 cm<sup>3</sup>/g. The pore size distribution, obtained from the adsorption branch of the isotherms by the BJH method (Fig. S1a *inset*), presents one narrow peak at 5.1 nm, which is consistent to TEM observation. The synthesized TiPPh-amine sample possesses amorphous framework walls, as revealed by wide angle XRD pattern (Fig. S1b *inset*). One single and broad diffraction peak is present in the low-angle region (Fig. S1b), suggestive of the wormhole-like mesopores without long-range order [X. Wang, J.C. Yu, et al., *Langmuir* **2005**, *21*, 2552.].

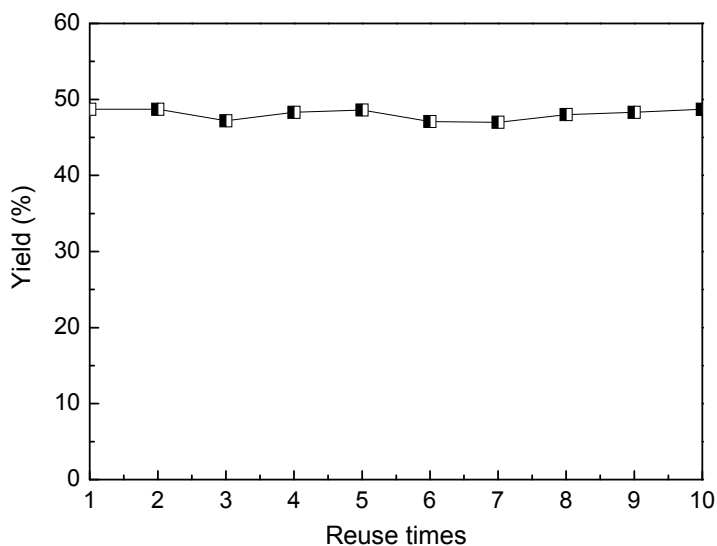

**Fig. S2** Catalytic recycle study of the TiPPh-butylamine material.

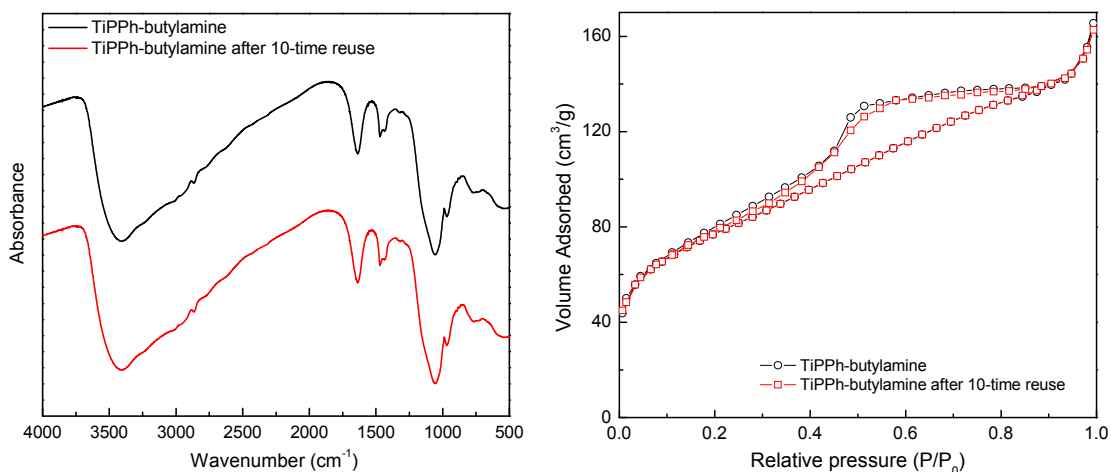

**Fig. S3** FT-IR (*left*) and N<sub>2</sub> sorption (*right*) measurements of TiPPh-butylamine catalyst before and after 10-time reuse.

The recyclability of TiPPh-butylamine was examined by isolating it from the reaction mixture (centrifugation, washing with acetone and drying). After 10-time reuse, the product yield was hardly decreased (Fig. S2). The FT-IR and N<sub>2</sub> sorption measurements were also performed, showing no obvious changes compared with that of the fresh TiPPh-butylamine catalyst, which confirmed the good retention of organic groups within the hybrid framework and the porous structure (Fig. S3).
